# Supplementary material for: Directed drift selected different movement strategy in heterogeneous habitats
Source: Research Square preprint supplement (doi:10.21203/rs.3.rs-6429589/v1), 2025-05-06
Supplement: Supplementary file 1 [file 041d28d6e2fc6848edb20527.pdf]

# Directed drift selected different movement strategy in fragmented habitats

Jamaal Jacobs<sup>1</sup>, Vaibhava Srivastava<sup>2</sup>, Rana D. Parshad<sup>2</sup>, Bo Zhang<sup>1\*</sup>

<sup>1</sup>Department of Integrative Biology, Oklahoma State University, Stillwater, OK, USA;

<sup>2</sup>Department of Mathematics, Iowa State University, Ames, IA 50011, USA;

\*Corresponding author: Bo Zhang, <sup>1</sup>Department of Integrative Biology, Oklahoma State University, Stillwater, OK, USA, 74078. Phone: 786-863-6669.

Email: bozhangophelia@gmail.com

## S1. APPENDIX

### *Mathematical Model*

Let  $u$  and  $v$  be the high and low dispersers in  $[0, L]$ .

$$\left\{ \begin{array}{l} u_t = d_1 \Delta u - cu_x + u(m_i(x) - b_1 u - c_1 v), \\ v_t = d_2 \Delta v - cv_x + v(m_i(x) - b_2 v - c_2 u), \\ d_1 u_x(0, T) - cu(0, T) = 0, d_2 v_x(0, T) - cv(0, T) = 0, \\ u_x(L, T) = v_x(L, T) = 0. \end{array} \right. \quad (\text{Right Drift})$$

$$\left\{ \begin{array}{l} u_t = d_1 \Delta u + cu_x + u(m_i(x) - b_1 u - c_1 v), \\ v_t = d_2 \Delta v + cv_x + v(m_i(x) - b_2 v - c_2 u), \\ u_x(0, T) = v_x(0, T) = 0, \\ d_1 u_x(L, T) - cu(L, T) = 0, d_2 v_x(L, T) - cv(L, T) = 0. \end{array} \right. \quad (\text{Left Drift})$$

$$\left\{ \begin{array}{l} u_t = d_1 \Delta u + u(m_i(x) - b_1 u - c_1 v), \\ v_t = d_2 \Delta v + v(m_i(x) - b_2 v - c_2 u), \\ u_x(0, T) = v_x(0, T) = 0, \\ u_x(L, T) = v_x(L, T) = 0, \end{array} \right. \quad (\text{No Drift})$$

12 **Theorem 1.** *Consider the systems (Right Drift), (Left Drift), (No Drift). These are well-posed.*

13 *That is there exist classical solutions to these systems that are global in time.*

14 *Proof.* The analysis and the well-posedness of the model follow from the work of (Lou and  
 15 Lutscher (2014); Lou et al. (2019)). Herein, our constructed  $m_i(x)$  growth/resource functions  
 16 that match the experimental setup can be devised using inverse hyperbolic type functions that are  
 17  $C^\infty(\Omega)$ . They are also chosen to be strictly positive on  $\Omega$ , so any sort of degeneracy is avoided.

18 Also note although the methods of (Lou et al. (2019)) consider symmetric inter and intra-specific  
 19 competition, a simple comparison argument such as

$$u(m_i(x) - u - v) \leq u(m_i(x) - b_1 u - c_1 v), \text{ for } b_1, c_1 > 1 \quad (1)$$

20 yields boundedness of solutions to our systems (Right Drift), (Left Drift), (No Drift). The  
 21 results follow. □

22 **Remark 1.** *Note, Lou et al. (2019) considers the above when  $b_1 = c_1 = b_2 = c_2$ , and obtain*  
 23 *competitive exclusion results. In our simulations, we see co-existence, but we have non-symmetric*  
 24 *inter and intra-specific competition. This warrants further theoretical investigation. We conjecture*  
 25 *coexistence can be proved under certain parametric assumptions on the competition coefficients.*

# NUMERICAL SIMULATIONS

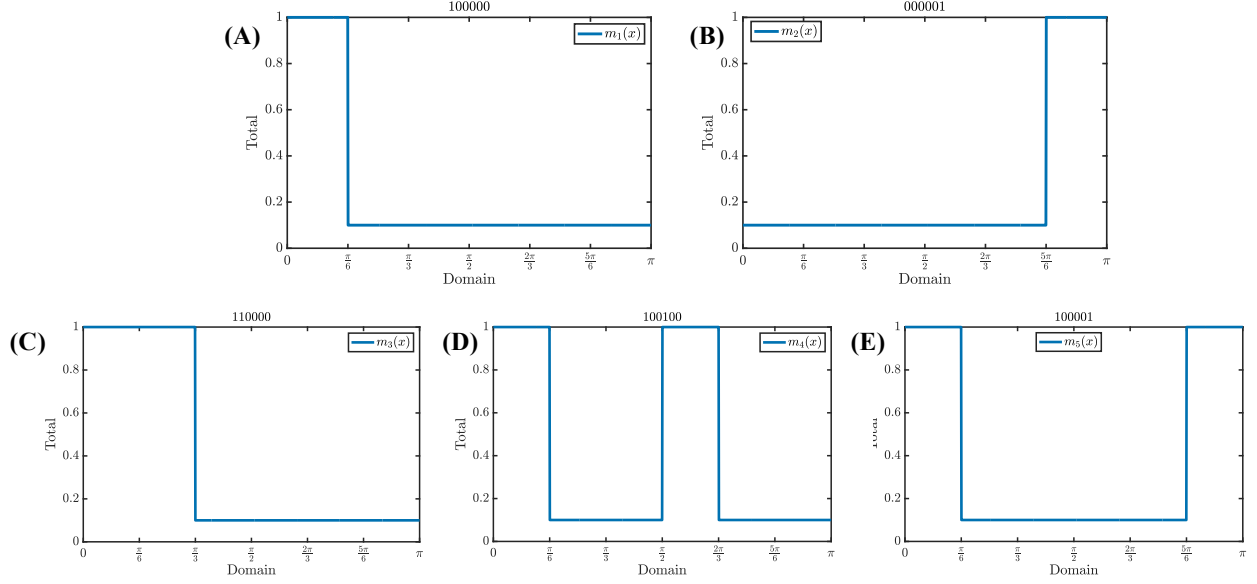

Figure S.1: Spatially explicit resource function for experimental environments

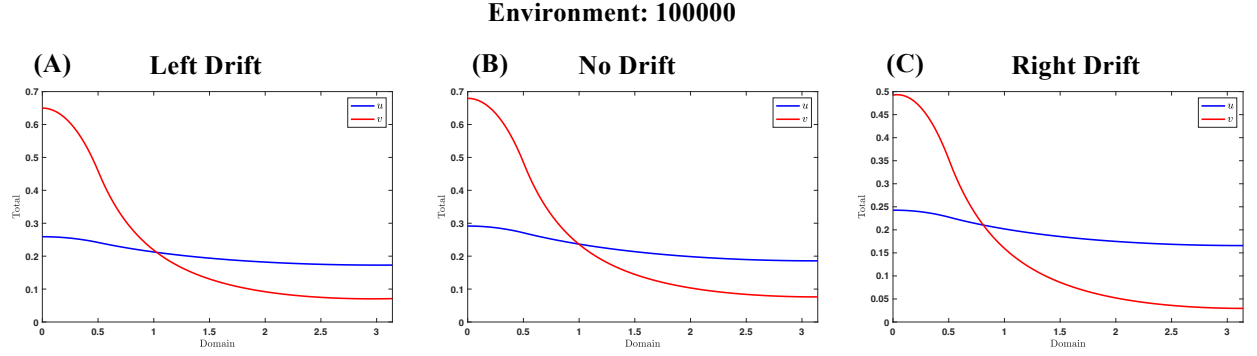

Figure S.2: Abundance in 1-column environment 100000. The initial conditions are  $[u_0, v_0] = [0.5, 0.5]\mathbb{1}_\Omega$ , where  $\Omega = [0, \frac{\pi}{6}]$ .  $\mathbb{1}_\Omega$  denotes the indicator function, which gives 1 if in  $\Omega$  and zero everywhere. The parameters are:  $d_1 = 1, d_2 = 0.1, c = 0.01, b_1 = 1, b_2 = 1$  (A)  $c_1 = 0.32$  and  $c_2 = 0.5$  (B)  $c_1 = 0.219$  and  $c_2 = 0.38$  (C)  $c_1 = 0.47$  and  $c_2 = 1.05$ .

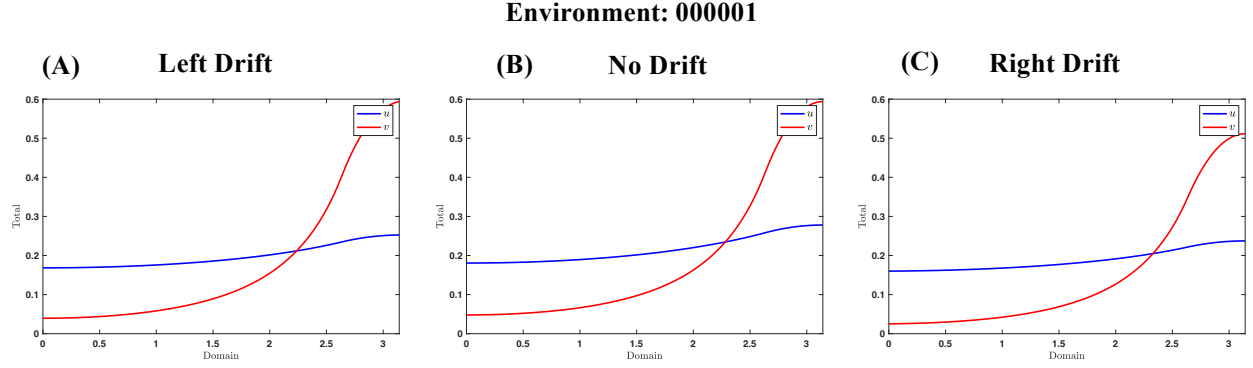

Figure S.3: Abundance in 1-column environment 000001. The initial conditions are  $[u_0, v_0] = [0.5, 0.5]\mathbb{1}_\Omega$ , where  $\Omega = [0, \frac{\pi}{6}]$ .  $\mathbb{1}_{\Omega_1}$  denotes the indicator function, which gives 1 if in  $\Omega$  and zero everywhere. The parameters are:  $d_1 = 1, d_2 = 0.1, c = 0.01, b_1 = 1, b_2 = 1$  (A)  $c_1 = 0.42$  and  $c_2 = 0.88$  (B)  $c_1 = 0.3$  and  $c_2 = 0.67$  (C)  $c_1 = 0.5$  and  $c_2 = 1.05$ .

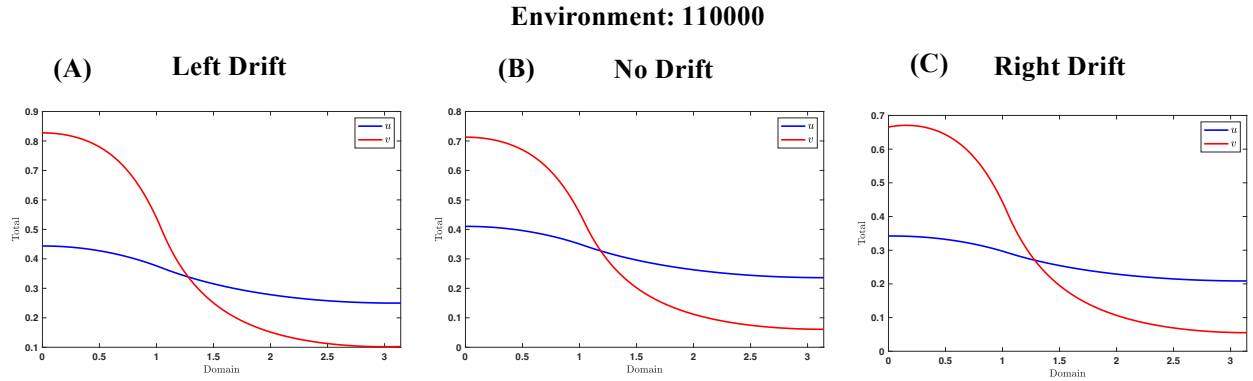

Figure S.4: Abundance in 110000 environment. The initial conditions are  $[u_0, v_0] = [0.5, 0.5]\mathbb{1}_\Omega$ , where  $\Omega = [0, \frac{\pi}{6}]$ .  $\mathbb{1}_{\Omega_1}$  denotes the indicator function, which gives 1 if in  $\Omega$  and zero everywhere. The parameters are:  $d_1 = 1, d_2 = 0.1, c = 0.01, b_1 = 1, b_2 = 1$  (A)  $c_1 = 0.32$  and  $c_2 = 0.3$  (B)  $c_1 = 0.44$  and  $c_2 = 0.6$  (C)  $c_1 = 0.58$  and  $c_2 = 0.78$ .

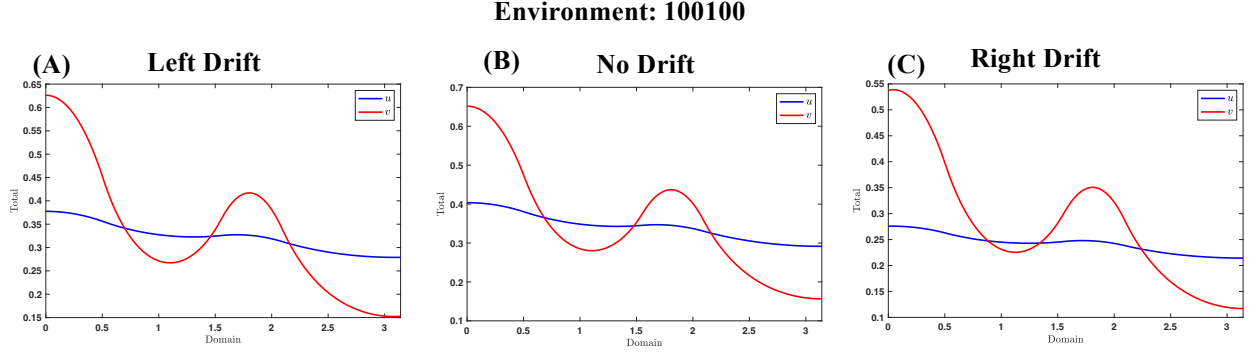

Figure S.5: Abundance in 100100 environment. The initial conditions are  $[u_0, v_0] = [0.5, 0.5]\mathbb{1}_\Omega$ , where  $\Omega = [0, \frac{\pi}{6}]$ .  $\mathbb{1}_{\Omega_1}$  denotes the indicator function, which gives 1 if in  $\Omega$  and zero everywhere. The parameters are:  $d_1 = 1, d_2 = 0.1, c = 0.01, b_1 = 1, b_2 = 1$  (A)  $c_1 = 0.29$  and  $c_2 = 0.44$  (B)  $c_1 = 0.219$  and  $c_2 = 0.37$  (C)  $c_1 = 0.596$  and  $c_2 = 0.825$ .

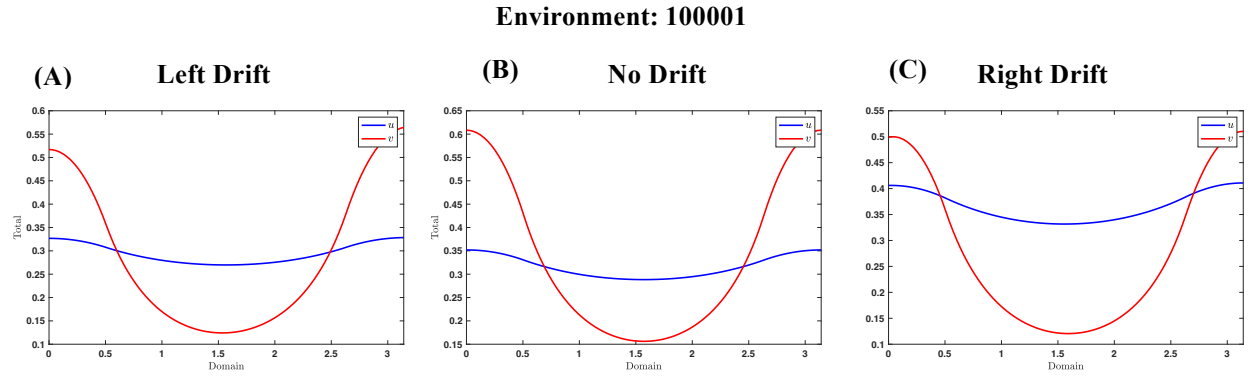

Figure S.6: Abundance in 100001 environment. The initial conditions are  $[u_0, v_0] = [0.5, 0.5]\mathbb{1}_\Omega$ , where  $\Omega = [0, \frac{\pi}{6}]$ .  $\mathbb{1}_{\Omega_1}$  denotes the indicator function, which gives 1 if in  $\Omega$  and zero everywhere. The parameters are:  $d_1 = 1, d_2 = 0.1, c = 0.01, b_1 = 1, b_2 = 1$  (A)  $c_1 = 0.42$  and  $c_2 = 0.76$  (B)  $c_1 = 0.29$  and  $c_2 = 0.5$  (C)  $c_1 = 0.17$  and  $c_2 = 0.62$ .

## REFERENCES

- 28 Lou, Y. and Lutscher, F. (2014). Evolution of dispersal in open advective environments. *Journal*  
29 *of Mathematical Biology*, 69:1319–1342.
- 30 Lou, Y., Zhao, X. Q., and Zhou, P. (2019). Global dynamics of a lotka–volterra competi-  
31 tion–diffusion–advection system in heterogeneous environments. *Journal de Mathématiques*  
32 *Pures et Appliquées*, 121:47–82.
